# Supplementary material for: Impacts of Time-Fed Concentrate-Based Diets on Plasma Metabolites, Rumen Histology, and mRNA Expression of Hepatic Enzymes of Wethers
Source: MDPI journal article supplement (doi:10.3390/ani10040686), 2020-04-15
Supplement: s1 [file s1]

**Table S1.** Box-Cox transformation received by mRNA expression of genes used in this study.

| Gene           | $\lambda$ | Transformation     |
|----------------|-----------|--------------------|
| <i>SAA</i>     | 0         | $\ln(x)$           |
| <i>HPT</i>     | 0         | $\ln(x)$           |
| <i>ALB</i>     | 1         | No <sup>1</sup>    |
| <i>HAMP</i>    | 0.5       | $\text{Sqrt}(x)$   |
| <i>HMGCR</i>   | -0.5      | $1/\text{Sqrt}(x)$ |
| <i>HMGCS-2</i> | 0.5       | $\text{Sqrt}(x)$   |
| <i>PC</i>      | -1        | $1/x$              |

$\ln$  = natural logarithm,  $\text{Sqrt}$  = Square root, *SAA* = Serum  $\alpha$ -amyloid, *HPT* = Haptoglobin, *ALB* = Albumin, *HAMP* = Hepcidin, *HMGCR* = 3-hydroxy-3-methylglutaryl-CoA reductase, *HMGCS-2* = 3-hydroxy-3-methyl-glutaryl CoA-synthase, *PC* = Pyruvate carboxylase. <sup>1</sup> No transformation was required.

**Table S2.** Least square means  $\pm$  SEM of mRNA expression of Serum  $\alpha$ -amyloid and Haptoglobin before back transformation.

| Gene       | P1                | P2                | P3                |
|------------|-------------------|-------------------|-------------------|
| <i>SAA</i> | $-3.28 \pm 0.829$ | $-0.96 \pm 0.829$ | $-2.34 \pm 0.741$ |
| <i>HPT</i> | $-0.80 \pm 0.730$ | $0.93 \pm 0.730$  | $-1.19 \pm 0.653$ |

*SAA* = Serum  $\alpha$ -amyloid, *HPT* = Haptoglobin.
